1 **State-dependent cortical unit activity reflects dynamic brain state transitions in anesthesia**

2 Heonsoo Lee<sup>1</sup>, Shiyong Wang<sup>1</sup>, Anthony G. Hudetz<sup>1,\*</sup>

3 <sup>1</sup>Center for Consciousness Science, Department of Anesthesiology, University of Michigan, Ann Arbor,  
4 MI, USA, 48105

5 \*Corresponding author: Dr. Anthony G. Hudetz

6 Email: [ahudetz@umich.edu](mailto:ahudetz@umich.edu)

7 Number of pages: 43

8 Number of figures: 6, tables: 2

9 Word counts: Abstract: 244, Introduction: 255, Discussion: 1431

10 Conflicts of Interest: None

11 Acknowledgements: Research reported in this publication was supported by the National Institute of  
12 General Medical Sciences of the National Institutes of Health under award number R01-GM056398 and  
13 the Center for Consciousness Science, Department of Anesthesiology, University of Michigan Medical  
14 School, Ann Arbor, Michigan, USA. The content is solely the responsibility of the authors and does not  
15 necessarily represent the official views of the National Institutes of Health. The authors thank members  
16 of the Center for Consciousness Science, University of Michigan Medical School, for valuable  
17 comments and Kathy Zelenock, MS for her assistance in laboratory operations and manuscript editing.

18 **ABSTRACT**

19 How anesthesia affects cortical neuronal spiking and information transfer could help understand the  
20 neuronal basis of conscious state. Recent investigations suggest that global state of the anesthetized  
21 brain is not stationary but changes spontaneously at a fixed level of anesthetic concentration. How  
22 cortical unit activity changes with dynamically transitioning brain states under anesthesia is unclear. We  
23 hypothesized that distinct cortical states are characterized by distinct neuronal spike patterns.  
24 Extracellular unit activity was measured with sixty-four-channel silicon microelectrode arrays in cortical  
25 layers 5/6 of primary visual cortex of chronically instrumented, freely moving male rats ( $N = 7$ ) during  
26 stepwise reduction of the anesthetic desflurane (6, 4, 2, and 0%). Unsupervised machine learning  
27 applied to multi-unit spike patterns revealed five distinct brain states of which four occurred at various  
28 anesthetic concentrations and shifted spontaneously. In deeper anesthesia states, the number of active  
29 units and overall spike rate decreased while the remaining active units showed increased bursting  
30 (excitatory neurons), spike timing variability, unit-to-population correlation and unit-to-unit transfer  
31 entropy, especially among putative excitatory units, despite the overall decrease in transfer entropy. A  
32 novel desynchronized brain state with increased spike timing variability, entropy and electromyographic  
33 activity that occurred mostly in deep anesthesia was discovered. These results provide evidence for  
34 distinct unit activity patterns associated with spontaneous changes in local cortical brain states at  
35 stationary anesthetic conditions. The appearance of a paradoxical, desynchronized brain state in deep  
36 anesthesia contends the prevailing view of monotonic dose-dependent anesthetic effects on the brain.

37 **SIGNIFICANCE STATEMENT**

38 Recent studies suggest that spontaneous changes in brain state occur under anesthesia. However, the  
39 spiking behavior of cortical neurons associated with such state changes has not been investigated. We  
40 found that local brain states defined by multi-unit activity had non-unitary relationship with the current  
41 anesthetic level. A paradoxical brain state displaying asynchronous firing pattern and high  
42 electromyographic activity was found unexpectedly at high-dose anesthesia. In contrast, the  
43 synchronous fragmentation of neuronal spiking appeared to be a robust signature of the state of  
44 anesthesia. The findings challenge the assumption of monotonic, anesthetic dose-dependent behavior of  
45 cortical neuron populations. They enhance the interpretation of neuroscientific data obtained under  
46 anesthesia and understanding of the neuronal basis of anesthetic-induced state of unconsciousness.

47

## 48 INTRODUCTION

49 Recent studies of large-scale brain activity found that multiple brain states appear at a constant  
50 anesthetic concentration and conversely, one brain state can be observed at different anesthetic levels  
51 (Chander et al., 2014; Hudson et al., 2014; Hudson, 2017; Li et al., 2019). The degeneracy in the  
52 relationship between brain state and anesthetic concentration suggests that the neuronal network  
53 spontaneously shifts between two or more transient attractors (metastability) or switches multiple stable  
54 attractors via external perturbation or noise (multistability) (Hudson et al., 2014; Hudson, 2017; Li et al.,  
55 2019).

56 Despite these observations, most studies of unit activity assume a one-to-one relationship between brain  
57 state and anesthetic concentration and investigate dose-dependent changes of neuronal activity (Vizuete  
58 et al., 2012; Sellers et al., 2013; Vizuete et al., 2014). This would be surprising and suggests that the  
59 spiking dynamics of individual unit activities in different brain states under anesthesia has been poorly  
60 explored. Detailed information about the spiking dynamics during shifting brain states is arguably  
61 important for interpreting neuroscientific data obtained under anesthetized conditions and to understand  
62 the neuronal mechanisms of changing states of consciousness.

63 In an attempt to fill this gap of knowledge, we measured single unit spiking patterns of neuronal  
64 populations in chronically instrumented rodents subjected to multiple levels of anesthesia and applied  
65 machine learning to identify brain states independent of the actual anesthetic concentration. We  
66 hypothesized that brain states identified by specific features of population (multi-unit) activity will show  
67 degeneracy in the relationship with anesthetic concentration and that these states will be characterized  
68 by distinct spike activity patterns.

## 69 **METHODS**

### 70 **Electrode implantation**

71 The study was approved by the Institutional Animal Care and Use Committee in accordance with the  
72 Guide for the Care and Use of Laboratory Animals of the Governing Board of the National Research  
73 Council (National Academy Press, Washington, D.C., 2011).

74 Eight adult male Long-Evans rats (300-350 g weight) were housed in a reverse light-dark cycle room for  
75 5-7 days prior to surgical implantation. Ad libitum access for food and water was provided while the  
76 animals remained in the room for the duration of the experiment. A multi electrode array consisting of  
77 64-contact silicon probes (shank length 2 mm, width 28-60  $\mu\text{m}$ , probe thickness 15  $\mu\text{m}$ , shank spacing  
78 200  $\mu\text{m}$ , row separation 100  $\mu\text{m}$ , contact size 413  $\mu\text{m}^2$ ; custom design a8x8\_edge\_2mm100\_200\_413,  
79 Neuronexus Technologies, Ann Arbor, MI) was chronically implanted in the primary visual cortex of  
80 each rat. A pair of insulated wires (PlasticsOne, Inc., Roanoke, VA), exposed at the tips, was positioned  
81 bilaterally into the nuchal muscles to record electromyogram (EMG).

82 A craniotomy of rectangular shape of approximately  $2 \times 4$  mm was prepared, the exposed dura mater  
83 was resected, and the electrode array was inserted using a micromanipulator to the final position 1.6 mm  
84 below the pial surface. The perimeter was covered with silicone gel (Kwik-Sil, World Precision  
85 Instruments, Sarasota, FL). Additional sterilized stainless-steel screws were used to secure the electrode  
86 to the cranium. The assembly was embedded with Cerebond (MyNeuroLab, Saint Louis, MO).  
87 Carprofren (5 mg/kg s.c. once daily) was administered for 2 and 7 days, respectively. The animals were  
88 observed for 7–10 days for any infection or other complications.

### 89 **Experimental design**

90 One to eight days after surgery, the animals were placed in a closed, ventilated anesthesia chamber for  
91 continuous recording of extracellular potentials in dark environment. Desflurane was administrated with  
92 a stepwise decreasing concentration, 6%, 4%, 2%, and 0%. Between every concentration levels, there  
93 was a 15 minutes of transient period which allowed to reach equilibrium concentration (Fig. 1A). Each  
94 concentration level comprised of resting state and visual stimulation sessions, during which light flashes  
95 of 1 and 10 ms durations were delivered to the retina by transcranial illumination with randomized  
96 intervals (2-4 seconds). Neural response to visual flashes is beyond the scope of the study and thus the  
97 electrophysiological recordings during the visual stimulation session were not used in this study.  
98 Spontaneous activity during resting state session was recorded for twenty minutes per each desflurane  
99 level. For one experiment which was performed in the beginning of the study, only forty minutes of  
100 spontaneous activity was recorded (ten minutes per anesthetic concentration). Because all  
101 measurements of neuronal activity (spike rate, burst ratio, etc.) were quantified from 10 second epochs,  
102 ten minutes data length per desflurane concentration should not affect the final conclusions and the data  
103 was kept for the analysis. Anesthetic concentration in the holding chamber was continuously monitored  
104 (POET IQ2 monitor; Criticare Systems, Inc., Waukesha, WI). Core body temperature was maintained at  
105 37°C by subfloor heating.

## 106

### 107 **Electrophysiological Recording and identification of single units**

108 Extracellular potentials were recorded using SmartBox (Neuronexus Technologies, Ann Arbor, MI) at  
109 30 kHz sampling rate. The data were used for both detecting unit activities (high frequency  
110 components; > 300 Hz) and for local field potentials (low frequency components; < 100 Hz). To  
111 investigate unit activities, the sixty-four signals were median-referenced. For every time stamp with  
112 signal amplitude larger than 10 SD, the periods  $\pm 1$  second of those time stamps were removed. The

113 records were also visually inspected for noticeable noise episodes that were manually excluded from the  
114 analysis. One experiment was excluded from the analysis due to severe noise contamination ( $n = 7$ ).  
115 Single unit activity (SUA) was identified using the clustering software Spiking Circus, a template-based  
116 spike sorting method (Yger et al., 2018). On average,  $36 \pm 14$  (mean  $\pm$  SD) single units were obtained  
117 per animal. The SUAs were further classified into putative excitatory (pE) and inhibitory (pI) units  
118 based on the spike waveform, autocorrelogram and cross-correlogram. Units with short half-amplitude  
119 width, short trough-to-peak time, and fast-spiking pattern (a prominent peak near 10-30 ms of  
120 autocorrelogram) were manually selected as a pI (Csicsvari et al., 1998; Sirota et al., 2008) (Fig. 1B-C).  
121 The rest of the units were classified into PE. Cross-correlogram can be used to identify putative  
122 monosynaptic connections (Vizuite et al., 2012) but the chance of finding connections is small when the  
123 recording sites are relatively far from each other. As an alternative, we calculated cross-correlogram  
124 between individual units (reference unit) and multi-unit activity (MUA; the summation of SUAs), then  
125 compared the level of MUA before and after spike events of individual units (Fig. 2D). That is, our  
126 approach is based on a conjecture that pI (pE) units, on average, inhibit (excite) other units resulting in a  
127 negative (positive) asymmetry in cross-correlogram; the asymmetry of cross-correlogram was defined as  
128  $(X-Y)/(X+Y)$ , where X (Y) is the number of spike events of all the other units 1 to 5 second after  
129 (before) the spike of the reference unit. All properties of local field potential (LFP) and spikes were  
130 calculated for non-overlapping 10 second epochs by assuming stationarity over the timescale of  
131 anesthetic-induced slow oscillations and burst-suppression pattern.

132

### 133 **Spectral analysis of LFP**

134 LFP signals were median-referenced, and one high-quality channel was chosen for the spectral analysis.  
135 For every time stamp with signal amplitude larger than 5 SD, the periods  $\pm 1$  second of those time

136 stamps were removed. Power spectral density (PSD) of LFP in each epoch was obtained by Welch's  
137 method; the 10 second epochs were divided into 4 second windows with 50% overlap, and time series  
138 data in each window was multiplied with Hanning window to perform the fast Fourier transform. A  
139 function "welch.py" in Python SciPy library (<http://www.scipy.org>) was used. The calculated PSDs  
140 from each epoch were concatenated in order to visualize the time-varying pattern of PSD (spectrogram).  
141 For the comparison of PSDs between different brain states, PSDs from epochs in each brain state were  
142 averaged.

143

#### 144 **EMG activity**

145 EMG signal was recorded with 1–500 Hz analog band-pass filter and 30 kHz sampling rate, and was  
146 used as a surrogate measure of the vigilance level. EMG signal was first down-sampled to 3 kHz and  
147 PSD was calculated using the same parameters with the PSD calculation of LFP signal. The PSD values  
148 with frequencies lower than 250 Hz were discarded due to cardiac artifact contamination. Next, overall  
149 EMG activity level at each of the consecutive epochs was estimated by the sum of the log-transformed  
150 PSD values. For a comparison across different animals, EMG activity was to a range between zero and  
151 one.

152

#### 153 **Single-unit spike properties**

154 *Spike rate (SR)* Because SR is known to follow lognormal distribution, linear-scale SR values were log-  
155 transformed (Buzsáki and Mizuseki, 2014), and averaged for nonoverlapping consecutive 10-second  
156 epochs. Zero spike rates were substituted by  $SR = 10^{-2}$  Hz before the log-transformation.



157 *Gini coefficient* The Gini coefficient was used to estimate the dispersion of the SR distribution. It was  
158 originally intended to represent the income or wealth disparity, and is commonly being used in  
159 measurement of inequality. For non-negative values, the Gini coefficient can theoretically range from  
160 zero to one, zero being complete equality and one being complete inequality. Gini coefficient was  
161 calculated from raw (not log-transformed) SR data, by plotting the neuronal population sorted by SR on  
162 the x-axis and cumulative SR on the y-axis (Lorenz curve, (Lorenz, 1905)). The area below the Lorenz  
163 curve of the empirical SR data (area A) is then compared to the area below the Lorenz curve of an ideal  
164 SR data (area B), in which all neurons have an equal SR value. The Gini coefficient value is finally  
165 defined as a ratio, (B-A)/B.

166 *Burst ratio (BR)* Two spikes with short inter-spike intervals (ISI) (<10 ms) were considered as an  
167 indication of bursting spike. BR was defined as the number of ISIs shorter than 10 ms (bursting spikes)  
168 divided by the total number of ISIs in each epoch. Units with SR < 1 Hz in each epoch were considered  
169 as inactive units and excluded from the BR calculation. BR values were log-transformed and averaged  
170 for consecutive 10-second epochs.

171 *Local variation (LV)* Spike timing variability, or spike irregularity was estimated by local variation  
172 (Shinomoto et al., 2003) from each spike train of SUA. LV was defined as,

173 
$$LV = \frac{1}{n_{isi} - 1} \sum_{i=1}^{n-1} \frac{3(T_i - T_{i+1})^2}{(T_i + T_{i+1})^2},$$

174 where  $T_i$  is the duration of  $i$ th ISI and  $n_{isi}$  is the number of ISIs. LV is zero for constant  $T_i$ , and  
175 approaches one for a sufficiently long Poisson ISI sequence. LV is thought to differentiate the degree of  
176 intrinsic spiking randomness of individual neurons more effectively than the other measures, such as

177 coefficient of variation of ISI (Shinomoto et al., 2003). LV values were not log-transformed because it  
178 did not show lognormal distribution.

179 *Transfer entropy (TE)* was used to estimate directional functional connectivity among individual units  
180 (Schreiber, 2000; Ito et al., 2011). For two spike trains of units  $x$  and  $y$ , TE can be estimated as

$$181 \quad TE_{y \rightarrow x} = \sum_{x_{t+1}, x_t^{(m)}, y_t^{(m)}} p(x_{t+1}, x_t^{(m)}, y_t^{(m)}) \log \frac{p(x_{t+1} | x_t^{(m)}, y_t^{(m)})}{p(x_{t+1} | x_t^{(m)})},$$

182 where  $m$  denotes embedding dimension (pattern size), and  $p(\cdot)$  implies probability.  $x_t^{(m)}$  denotes  $m$  size  
183 spike pattern. For example, for  $m = 3$  cases, there are 8 ( $=2^3$ ) possible spike patterns ( $[0,0,0]$ ,  $[0,0,1]$ ,  
184  $\dots$ ,  $[1,1,1]$ ).  $TE_{y \rightarrow x}$  ( $TE_{x \rightarrow y}$ ) measures the statistical influence of unit  $y$  ( $x$ ) on unit  $x$  ( $y$ ).  $TE_{y \rightarrow x}$  is the  
185 reduced amount of uncertainty in future of  $x$  by knowing the past of  $y$  given past of  $x$ . TE can also be  
186 thought of a mutual information ( $I$ ) between  $x_{t+1}$  and  $y_t^{(m)}$  given past of  $x_t^{(m)}$ :

$$187 \quad TE_{y \rightarrow x} = I(x_{t+1}; y_t^{(m)} | x_t^{(m)})$$

188 We used  $m = 3$ , and all spike trains were down-sampled to 125 Hz before calculation of TE; that is, the  
189 individual value in each bin of the spike train is one if there is one or more spikes within the 8 ms bin  
190 and zero otherwise.

191

## 192 **Multi-unit spike properties**

193 Three measures, the total number of spikes (TNS), longest period below mean (LPBM), and sample  
194 entropy (SpEn), were calculated with MUA signal (i.e., sum of all SUAs). TNS represents the amount  
195 of total spike events occur in a sampled neural network. For the calculation of LPBM and SpEn, the  
196 MUA signal was convolved with Gaussian kernel with standard deviation of 25 ms (Vyazovskiy et al.,

197 2011), and continuous spike signal was obtained. Details of LPBM and SpEn estimation are described  
198 below.

199 *Longest period below mean (LPBM)* LPBM measures the time length of the longest inactive periods (or  
200 active periods depending on the time series characteristics) in a given time series (Lubba et al., 2019);  
201 first, the time lengths of all consecutive values below the mean of time series are calculated and then the  
202 maximum of the time lengths are obtained as a LPBM value. LPBM is known to be one of the  
203 important temporal statistics in time series analysis (Lubba et al., 2019), and was used in this study to be  
204 a measure of persistent inactiveness of spike activity. A high LPBM value in MUA signal implies an  
205 existence of long inactive period suggesting synchronous fragmentation of spike activities, whereas a  
206 low LPBM indicates more continuous activity suggesting an irregular and asynchronous spiking pattern.  
207 Therefore, LPBM is expected to yield a high value when spikes are synchronously fragmented in time  
208 (e.g., slow oscillation and burst-suppression). In addition, LPBM will further increase as burst-  
209 suppression ratio increases with deepening of anesthesia.

210 *Sample entropy (SpEn)* SpEn was used to estimate the statistical irregularity of MUA as a time series.  
211 SpEn is an approximation of Kolmogorov entropy that measures the predictability of consecutive time  
212 series values based on their past values (Richman et al., 2000). A high SpEn value implies random or  
213 unpredictable dynamics while a low SpEn value indicates regular or deterministic dynamics. SpEn has  
214 been used to quantify depth of anesthesia and the level of consciousness in EEG studies (Liang et al.,  
215 2015; Liu et al., 2018), and it generally decreases as anesthetic deepens. To calculate the SpEn, first an  
216 embedded time series is obtained,

217 
$$X_t = \{x_t, x_{t+1}, \dots, x_{t+(m-1)}\}, t = 1, 2, \dots, N - (m - 1),$$

218 where  $x_t$  is time series value (convolved MUA signal in this study) at time  $t$ , and  $m$  is embedding  
219 dimension (pattern size). Second, the correlation sum is calculated from the embedded time series,

$$220 \quad C_i^m(r) = \frac{1}{N - m - 1} \sum_{j=1}^{N-m-1} \Theta(r - \|X_i, X_j\|).$$

221 where  $\Theta(\cdot)$  denotes a Heaviside step function and  $\|\cdot\|$  implies Euclidean distance between two vectors,  
222 and  $r$  represents the distance criteria. We used  $m = 3$ , and  $r = 0.2$  standard deviation of amplitudes  
223 within each epoch following previous literature (Liang et al., 2015; Liu et al., 2018). Finally, the SpEn  
224 is defined as,

$$225 \quad \text{SpEn}(m, r, N) = \log \sum_{i=1}^{N-m} C_i^m(r) - \log \sum_{i=1}^{N-m} C_i^{m+1}(r).$$

226 Before the SpEn calculation, the MUA signal was convolved as in the case of LPBM calculation, and  
227 down-sampled to 125 Hz.

228

## 229 **Classification of brain states**

230 The primary focus of the study was to examine brain state-dependent changes in spike activity patterns  
231 during and after anesthesia. To this end, spike train data was first segmented into 10 second  
232 nonoverlapping epochs. Then five features from population level spike activity, that is, the total number  
233 of spikes (TNS), mean of log-transformed spike rate ( $\text{SR}_m$ ), mean local variation ( $\text{LV}_m$ ), longest period  
234 below mean (LPBM), and sample entropy (SpEn) were measured in each epoch. The five features have  
235 different ranges with each other, and different animals often show different ranges for a single feature.  
236 Therefore, to normalize the feature values and mitigate the effect of outliers, the feature data were

237 divided into sextiles in each animal, and were transformed by linearly scaling to a given range (0-1); that  
238 is, the median of the data in the first sextile was considered zero and the median of data in the last sextile  
239 was considered one in each experiment. This procedure is based on an assumption that the range of  
240 each of the five features is similar across different experiments with the same anesthetic protocol.

241 The five features were then used for unsupervised clustering to delineate distinct brain states.  
242 Hierarchical agglomerative algorithm with Ward's linkage method were applied for the clustering of  
243 brain states, using Python package Scikit-Learn ([www.scikit-learn.org](http://www.scikit-learn.org)). Each data point of a 10 second  
244 epoch was first treated as a single cluster in feature space, then the points were successively merged  
245 until all clusters merged into a single cluster. The method does not require a specific number of clusters  
246 ( $K$ ) at the beginning step, and the clusters can be easily identified from the hierarchy tree (dendrogram)  
247 that is built from the algorithm. We determined the optimal number of clusters based on the dendrogram  
248 and so-called elbow method. A within-cluster distance was plotted against the number of clusters, and  
249 the point where the curve sharply bends was chosen as an "elbow" point. We used the maximum of the  
250 2<sup>nd</sup> order difference of the distance- $K$  curve to find the elbow point. We neglected the  $K = 2$  cases, in  
251 which the brain state simply represents anesthetized (6-2% desflurane) and waking state (0%  
252 desflurane). In our preliminary studies, adding more features and performing principal component  
253 analysis barely changed the clustering results.

254

## 255 **Statistical analysis**

256 All statistical analyses were conducted using StatsModels library ([www.statsmodels.org](http://www.statsmodels.org)) in Python 3.7.  
257 For all measures, to test the difference across the brain states, statistical comparisons were first  
258 performed using linear mixed models (LMM) based on restricted maximum likelihood estimation. For

259 all LMMs, the brain states (categorical independent variable) were used as a fixed effect. For the  
260 properties of population activity (i.e., PSD of LFP, the five input features, and EMG), the random effect  
261 included the seven animals. For the individual unit properties such as SR and LV, the random effect  
262 included the different animals and units. Post-hoc pairwise comparisons were made between the brain  
263 states using a Bonferroni adjusted p-value  $< 0.05$  (number of hypotheses = 10).

## 264 **RESULTS**

### 265 **Cross-correlogram between SUA and MUA**

266 The classification of putative excitatory (pE) and inhibitory (pI) units was conducted based on spike  
267 waveform and autocorrelogram as described in method section. 36 out of 251 units were classified as pI  
268 unit (14.4%). We further confirmed the classification by examining the asymmetry of cross-  
269 correlogram between SUA and MUA. As predicted, the asymmetry of pI (pE) units showed negative  
270 (positive) values on average (Fig. 2E); statistical significance was seen both in pE and pI units (one  
271 sided *t*-test with Bonferroni correction,  $p = 0.045$  for pE, and  $p < 10^{-6}$  for pI). This suggests that pI (pE)  
272 units on average, tend to inhibit (promote) population activity, reassuring the classification of neuronal  
273 types.

274

### 275 **Brain state shifts during anesthesia**

276 In order to identify local brain states from the electrophysiological recording independent of the nominal  
277 anesthetic concentration, we visualized how LFP spectrogram and MUA characteristics change over  
278 time during the experiment. In all animals, the LFP spectrogram, total number of spikes (TNS), mean of  
279 log-transformed spike rate ( $SR_m$ ), mean of local variation ( $LV_m$ ), longest period below mean (LPBM),  
280 and sample entropy (SpEn) profoundly changed during (6,4, and 2% desflurane) and after (0%  
281 desflurane) anesthesia. Figure 2A illustrates the time course of these variables in one animal as an  
282 example. Importantly, both the spectrogram and the MUA features change not only between but also  
283 within each recording period at constant anesthetic concentration. For instance, in the middle of the  
284 recording at 6% desflurane, low frequency ( $< 4$  Hz) power in the LFP spectrogram and LPBM abruptly  
285 increased for no evident reason. The additional abrupt transitions are seen at 2% desflurane. Other

286 animals also showed similar transitions, with either positive or negative sign, at various anesthetic levels  
287 (data not shown). This example demonstrates that a simple one-to-one relationship between the chosen  
288 LFP/MUA variables and the anesthetic concentration does not exist suggesting the need for a more  
289 nuanced identification of brain states from these variables.

290 To achieve this goal, we used agglomerative clustering on the five MUA variables as input features from  
291 data pooled from all animals to identify distinct, unitary brain states. The scatter plots in Fig. 2B  
292 illustrate pairwise relationships of the five MUA features in 5 clusters. The choice of 5 clusters could be  
293 justified by the dendrogram (Fig. 2C), which illustrates that between-cluster distances were large and  
294 within-cluster distances were small at  $K = 5$ . We also calculated a within-cluster distance as a function  
295 of  $K$  (Fig. 2D). The 2<sup>nd</sup> order difference of the distance curve was maximized at  $K = 5$ , suggesting it was  
296 an optimal choice consistent with the dendrogram distances.

297 The five clusters identified by unsupervised clustering were designated as brain states S1 to S5 and the  
298 mean values of MUA variables among these states were statistically compared (Fig. 2E; Table 1). As  
299 found, S1 was characterized by the lowest TNS,  $SR_m$ , and SpEn and the highest LPBM indicating that  
300 S1 corresponded to burst-suppression (see Fig. 3A) typical to deep anesthesia. In fact, S1 was mostly  
301 observed at 6% desflurane (Fig. 2F-G). S5, on the other hand, was mostly observed at 0% desflurane  
302 (Fig. 2F). It was characterized by high spike activity (high TNS and  $SR_m$ ) and asynchronous firing  
303 patterns (high SpEn and low  $LV_m$ ). S2 and S4 had intermediate feature values between those of S1 and  
304 S5. S2 was mostly observed at 4% desflurane and S4 was mostly seen at 2% desflurane (Fig. 2F).

305 Interestingly, S3 was mostly found in 6% desflurane (Fig. 2F) similar to S1. However, S3 showed a  
306 distinct pattern from S1. It was characterized by high SpEn, relatively low  $SR_m$  and very low LBPM.  
307 TNS was not reduced as much as  $SR_m$ ; Notice that TNS indicates total number of spikes in the neuronal  
308 population and  $SR_m$  is the mean of log-transformed individual spike rates. The discrepancy suggests



309 that in S3, some neurons are inactive, but a few neurons emit a large number of spikes whereas these  
310 outliers are absent in S1. The details of spike rate distribution of neuronal population are analyzed  
311 further in the next section. The low LPBM indicates no clear distinction of active and inactive period in  
312 S3. The low LPBM, together with the high SpEn, implies that spiking pattern in the S3 was  
313 asynchronous.

314 Although brain state and anesthetic concentration were not uniquely related, a general trend of the  
315 occurrence probability of brain states with anesthetic level was evident; the S1, S2, S4, and S5 in order  
316 occurred mostly at correspondingly decreasing desflurane concentration. Therefore, it is reasonable to  
317 surmise that the occurrence probability of brain states, with an exception of S3, generally reflected the  
318 depth of anesthesia. Interestingly, however, they were also observed in other concentrations (Fig. 2G-  
319 F). For instance, at 6% desflurane, S1 was present 61% of the time, whereas at 4% desflurane, S1 was  
320 present 39% of the time; with the balance occupied by other brain states. Generally, several different  
321 brain states occurred at each constant anesthetic concentration. For example, at 6% desflurane, S1, S2,  
322 S3, and S4 appeared in non-negligible proportion (Fig. 2G). The many-to-many relationship between  
323 brain state and anesthetic concentration suggests a general need for brain state-dependent investigation  
324 of unit activity.

325

### 326 **LFP properties of the five brain states**

327 Because local field potentials (LFP) generally reflect the state in anesthesia, we examined LFP patterns  
328 and power spectral density (PSD) in each brain state. Typical LFP traces in five brain states are shown  
329 in Figure 3A from the same animal as in Fig. 2A. The LFP in S1 exhibited burst-suppression. S2 and  
330 S4 revealed relatively high amplitude, slow activity as generally expected in anesthesia. In contrast, S3

331 showed low amplitude, desynchronized LFP pattern similar to S5 corresponding to the awake state. The  
332 PSD averaged over all animals showed a power law relationship with frequency (Fig. 3B). The slightly  
333 higher slope in S2 and S4 was associated with the increased low-frequency (< 4 Hz) and decreased high-  
334 frequency (> 30 Hz) PSD (Fig. 3C) consistent with the anesthetic-induced suppression of high frequency  
335 gamma power and enhancement of delta and slow oscillation in EEG/LFP. S5 was characterized by  
336 increased theta (5-9 Hz) and high-frequency (> 20 Hz) power, the typical signatures of EEG/LFP in  
337 wakefulness. For a quantitative comparison we calculated the L/H ratio as  $\log_{10}\{(\text{PSD at } 0.25\text{-}4 \text{ Hz})/$   
338  $(\text{PSD at } 30\text{-}59 \text{ Hz})\}$  (Li et al., 2009). S2 and S4 showed significantly higher L/H ratio than S5 ( $p < 0.001$ ;  
339 Fig. 3E). In sum, the brain states, S1, S2, S4 are consistent with known LFP features of deep, moderate  
340 and light anesthesia, respectively; however, the LFP in S3 is unexpected and contrary to the generally  
341 presumed dose-dependent effect of anesthesia.

342

### 343 **High EMG activity in paradoxical desynchronized state**

344 The asynchronous firing pattern and relatively high LFP gamma power found in S3 raises the question  
345 whether the systemic arousal level may also be elevated in S3 as it is in S5. Generally, the EMG follows  
346 the level of arousal; therefore, the vigilance state of animals was estimated by EMG activity. Although  
347 both S1 and S3 occurred mostly in 6% desflurane, EMG of S3 was substantially higher than that of S1.  
348 The rescaled EMG traces from each animal exhibited higher muscle activity in S3 than in S1 and  
349 sometimes even higher than in S2 (Fig. 3F). Statistically significant differences in the rescaled EMG  
350 were found for S3 vs. S1 and S3 vs. S5 ( $p < 0.024$  and  $p < 10^{-6}$ , respectively with Bonferroni correction;  
351 Fig. 3G).

352

### 353 **Spike rate distribution across brain states and neuron types**

354 We compared the five brain states in terms of both the number of emitted spikes and the average spike  
355 rate of individual units. Generally, desflurane suppressed spike activity (Fig 4A-B). Figure 4A  
356 illustrates the time course of  $SR_m$  (average of log-transformed spike rate) and total spike number TNS  
357 from the same animal as in Figure 2A and 3A. As seen there, the traces of  $SR_m$  and TNS deviated from  
358 each other, especially at 6% desflurane. The TNS showed a pronounced decrease when the brain state  
359 transitioned from S3 to S1, whereas the  $SR_m$  remained the same. In S3 many units were inactive, even  
360 more than in S1 and S2, but there were a few units with very high SR (Fig. 4C). Accordingly, the  
361 variation of SR across individual units was the highest in S3. The variation in SR distribution was  
362 quantified by the Gini coefficient and the value of S3 was significantly larger than all others (Fig. 4D;  
363 Table 2). Specifically, Figure 4E implies that the highly active units in S3 are putative excitatory (pE)  
364 units. SR of active units in S3 was comparable to that in S5 (left panel in Fig. 4E) for pE units;  
365 however, SR of putative inhibitory (pI) active units in S3 was lower than that of pI units in S5 (right  
366 panel in Fig. 4E). For the mean SR of pE units, there were significant differences among the states  
367 except S1 vs. S3;  $SR_m$  increased from S1 or S3 through S2 and S4 to S5 (Fig. 4E; Table 2). For pI units,  
368  $SR_m$  was significantly higher in S5 than in all other states. Thus, in general, desflurane profoundly  
369 suppressed SR of both pE and pI units, but a few pE units in S3 remained highly active resulting in very  
370 high SR variation in this brain state.

371 A decrease in average firing rate could be generalized across all units or selective to specific units; e.g.  
372 due to a slowing of high-firing neurons. Therefore, we tested if units had a tendency to preserve their  
373 firing rate rank across brain states. SR similarity between any two epochs was estimated by calculating  
374 the Pearson correlation, and is presented in Figure 4G. The correlation matrix for individual units  
375 showed high within-state similarity and relatively low between-state similarity. The results from

376 correlation analysis of all units from all animals ( $n = 251$ ; Fig. 4G) were consistent with the result from  
377 the representative animal. Within-state comparisons of SR between the first half of the state and the  
378 second half of the same state are shown in the diagonal panels of Fig. 4G. Between-state comparisons  
379 between different states are shown in the off-diagonal panels of Fig. 4G). Orthogonal linear regression  
380 indicated that within-state similarity of SR ( $R > 0.93$  for all the five states) is generally higher although  
381 still significant ( $p < 0.001$ ) than between-state similarity except S1 vs. S2 (upper right inset in Fig. 4G).  
382 These findings indicate that SR profiles of individual units are preserved both within and between brain  
383 states.

384

### 385 **Temporal dynamics of spike activity**

386 Anesthesia not only suppresses the average spike rate as reported in the previous section (Fig. 4) but also  
387 modulates the temporal dynamics of spike activity (Vizuete et al., 2014). Raster plots in Figure 5A  
388 illustrate the changing temporal dynamics of spike activity. Note that in S1, S2, and S4, but not in S3,  
389 spike activity is more synchronized and temporally fragmented as compared to S5. Figure 5B displays  
390 raster and distribution of ISIs in seven representative units (four pE and three pI) from the same animal  
391 at different desflurane concentrations. The shape of ISI distribution was profoundly altered by the  
392 anesthetic. In wakefulness (S5) the ISI distribution was unimodal, whereas in the other four states it was  
393 bimodal or multimodal. This was partially due to the silent periods in spike activity; the large ISI values  
394 in the raster plot ( $ISI \sim 10^3$  ms) in Figure 5B (especially, S1 and S2) correspond to silent periods that  
395 contribute to a second peak in ISI histogram (Fig. 5B). In addition, some pE units in S1 and S2 tended  
396 to fire in brief bursts that were associated with short ISI ( $ISI < 10^1$  ms; Fig. 5B). Burst activity had also  
397 contributed to a peak near  $ISI \sim 10$  ms in the ISI histograms (Fig. 5B). In S3, two pE units exhibited  
398 very high SR (represented by dense points, asterisk in Fig. 5B) that was comparable to the SR in S5,

399 consistent with the findings in the previous section (Fig. 4E). Both units showed unimodal ISI  
400 distribution as in S5.

401 To determine if burst activity and long silence periods generally occurred in all units and all animals,  
402 autocorrelogram was calculated from all active units ( $SR \geq 1$  Hz). The averaged autocorrelogram  
403 showed a gradual increase of burst activity ( $ISI < 10$  ms) in pE units under anesthesia from S5 to S1 (left  
404 panel in Fig. 5C). A prominent peak was observed near at 6 ms that progressively decreased from S1 to  
405 S5 (left panel in Fig. 5C). As expected, autocorrelogram showed little or no evidence of bursting of pI  
406 units. Another measure of bursting of pE units, the burst ratio (BR) generally decreased from S1 to S5  
407 (Fig. 5D-E). Note that inactive units ( $SR < 1$  Hz) were excluded from the autocorrelogram and BR  
408 calculation. Similar to the SR distribution, BR did not follow normal distribution but skewed to the  
409 right, and thus it was log-transformed. Statistically significant difference in BR of pE units was found  
410 for all pairwise comparisons of brain states except S4 vs. S2, and S3 (Fig. 5E; Table 2). The increases in  
411 BR of pI units were less pronounced (right panel in Fig. 5C; Fig. 5E). For pI, BR of S3 was  
412 significantly lower than that of S1 and S5. The suppression in SR (Fig. 4), together with the changing  
413 temporal pattern of spiking indicates that neurons were either inactive or bursty at deeper levels of  
414 anesthesia. As the brain state changed from S1 to S5, more units became active and burst activity of  
415 active units in anesthesia was reduced in S5 (Fig. 5F). Again, S3 was an exception; BR of pE units in  
416 S3 was comparable to BR in S4.

417 The state-dependent changes of ISI distribution were also characterized by local variation (LV), a  
418 measure of spike timing variability - a measure that is sensitive to changes in both burst activity (small  
419 ISI) and to the presence of long silent periods (large ISI). LV showed a similar trend to BR across brain  
420 states but more effectively distinguished the five brain states especially for pI units (inset in Fig. 5E, H).  
421 LV of both pE and pI units decreased from S1 through S2 and S4 to S5. All pairwise comparisons

422 except S1 vs. S2 were statistically significant for pE units and all pairwise comparisons except S1 vs.  
423 S2, and S3 were significant for pI units (Fig. 5H; Table 2).

424 In summary, spiking activity of most units was profoundly inhibited by desflurane and the remaining  
425 active units showed an enhanced burst activity (for pE) and prolonged silence period (both pE and pI).  
426 In the paradoxical state S3 these effects were marginal such that units exhibited an irregular spiking  
427 pattern similar to that seen in wakefulness or S5.

428

### 429 **Individual neurons conform to population activity**

430 It is well known that desflurane, as well as other anesthetics, enhances spike-field correlation (Vizuete et  
431 al., 2014). We re-examined this effect as a function of brain state and found that desflurane increases  
432 spike-LFP correlation in all anesthetized states except S3. Specifically, the spike-triggered LFP  
433 amplitude decreased from S1 through S2, and S4 to S5 but not in S3 (Fig. 6A). We also examined  
434 spike-triggered MUA (Fig. 6B). The MUA in S5 was high and relatively flat across time lags, with a  
435 small oscillatory pattern in theta frequency range (5-9 Hz). From S4 through S2 to S1, the overall MUA  
436 level gradually decreased indicating a suppression of overall spike activity, while the MUA peak near 0  
437 ms remained almost the same indicating synchronous firing. In addition, the “dip” in MUA observed  
438 before and after spike events became deeper and wider as brain state moved from S4 through S2 to S1.  
439 Notice that in S1, the number of spikes near  $\pm 500$  ms to spike events is close to zero, consistent with the  
440 near-silent periods of LFP burst-suppression. Again, distinct from the other three anesthetic states, S3  
441 did not have a large trough on either side of spike events; whereas the MUA was substantially lower  
442 than in S5.

443 To evaluate the extent to which individual neurons conform to population activity, we quantified SUA-  
444 MUA correlation. Both spike train of individual single units and MUA signal were convolved with  
445 Gaussian kernel ( $SD = 25$  ms), then the Pearson correlation between the two convolved signals was  
446 calculated. A substantial change in correlation was observed in both pE and pI units (Fig. 6C); all  
447 pairwise comparisons were statistically significant for pE units and all pairwise comparisons except S3  
448 vs. S5 were significant for pI units (Table 2).

449

#### 450 **Information transfer depends on spike rate**

451 The correlation results described so far indicate a nondirectional relationship between convolved SUA  
452 and MUA signals. In order to estimate directional functional connectivity of neuronal interaction, TE  
453 between individual binary spike trains (SUAs) was calculated. Because spike activity itself is in part a  
454 result of neural communication, TE is presumed to depend on the degree of overall spike activity. In  
455 fact, TE was high for units with high SR and low for units with low SR (Fig. 6D). However, for a same  
456 range of SR, TE in anesthesia was higher than that in wakefulness. For example, for units having SR in  
457 a range of  $10^0$  to  $10^1$  Hz (the colored points inside the black squared box in each panel in Fig. 6D), TE  
458 values in S1 were higher than TE values in S5.

459

#### 460 **Synchronous firing correlates with enhanced information transfer**

461 The sum of TE values ( $TE_s$ ) for active units was highest in S5 and lowest in S1 and S3 (Fig. 6E left  
462 panel; Table 2), which is consistent with the general reduction of SR in anesthesia. However, the mean  
463 TE ( $TE_m$ ; the mean of TE values for active units) showed an opposite trend as it was the highest in S1  
464 (Fig. 6E, second panel from the left; Table 2). Note that inactive units ( $SR < 1$  Hz) were excluded from

465 all results in Figure 6E and the averaging was done across animals ( $n = 7$ ). To see if the SR exclusion  
466 threshold had any effect, TE results with different SR thresholds were compared in Figure 6F. When all  
467 units were included (SR threshold = 0 Hz), the  $TE_m$  was the highest in S5 (Fig. 6F, second panel from  
468 the left) as it should be qualitatively the same as in  $TE_s$  with SR threshold = 0 Hz (Fig. 6F, first panel  
469 from the left). However, as the SR threshold increased,  $TE_m$  of S5 became the lowest and that of S1 the  
470 highest (Fig. 6F, second panel from the left). Figure 6G illustrates that this differences among brain  
471 states do not merely reflect the SR changes; that is, the mean SR in S5 was the highest of all states  
472 across all SR thresholds, distinct from the  $TE_m$  for both pE and pI units. Note that for pE units, SR of S3  
473 was comparable to that of S5 when SR threshold  $> 0$  Hz.

474 The variation of all pairwise TE values (including inactive neurons) estimated by Gini coefficient was  
475 higher in anesthesia (S1-4) than wakefulness (S5) (Fig. 6H). This is because in anesthesia, many of the  
476 units were silent or inactive; thereby these units had very low TE, while the remaining active units had  
477 relatively high TE. Statistically significant differences in the Gini coefficient were found for S5 vs. S1,  
478 S2, S3, and S4 and S4 vs. S1, and S3 (Fig. 6I; Table 2).

479 The reason for the difference in change across brain states between the  $TE_s$  and  $TE_m$  can be attributed to  
480 (1) the number of active neurons and (2) synchronous activity (Fig. 4C), and explained by Venn diagram  
481 of information in Figure 6J. In wakefulness, there are many active neurons; therefore, the sum of  
482 transfer entropies of active neurons ( $TE_s$ ) is high (left in Fig. 6J). In anesthesia, on the other hand, there  
483 are far less number of active neurons (Fig. 4B-C); therefore, the sum of transfer entropies of active  
484 neurons ( $TE_s$ ) is relatively small. For the small number of active neurons (upper right in Fig. 6J), the  
485 enhanced synchronization in anesthesia produces a large value of transfer entropy; this contributes the  
486 high value of the mean transfer entropy between active neurons ( $TE_m$ ). For inactive neurons, however,



487 there is few information to be transferred, so that transfer entropy is extremely small (lower right in Fig.  
488 6J). This also explains why the variation in transfer entropy is high in anesthesia (Fig. 6H-I).

489

#### 490 **Information transfer along different connection types is state-dependent**

491 We further investigated whether desflurane differentially affects different connection types, by  
492 examining TE of neurons pairs, pE-to-pE, pI-to-pE, pE-to-pI, and pI-to-pI (Fig. 6E-F). The most  
493 pronounced change with state was observed in pE-to-pE connectivity indicated by a gradual decrease of  
494 TE from S1 to S5 (Fig. 6E). Statistical significance was seen in S1 vs. all the other states and S2 vs. S5  
495 (Table 2). The pI-to-pE connectivity was also higher in S1 vs. all the other states. The increase of TE in  
496 pE-to-pI and pI-to-pI connections was not as pronounced as in pE-to-pE and pI-to-pE cases. S3 showed  
497 relatively low TE such that pE-to-pI of S3 was lower than that of S1 (Fig. 6E, fifth panel from the left;  
498 Table 2) and pI-to-pI of S3 was lower than that of S4 (Fig. 6E, sixth panel from the left; Table 2). The  
499 findings suggest that desflurane exerts a more substantial effect on pE-to-pE and pI-to-pE connections  
500 than pE-to-pI and pI-to-pI connections.

## 501 **DISCUSSION**

502 The main goal of this work was to determine how cortical unit activity changes with dynamically  
503 transitioning brain states under anesthesia. Using unsupervised machine learning method, we identified  
504 five brain states with distinct neuronal spiking behavior. Multiple brain states were observed at a  
505 constant anesthetic concentration, and conversely, the same brain state occurred at different anesthetic  
506 concentrations. The spontaneous shift of brain states at fixed anesthetic level suggested that the  
507 neuronal network underwent metastable (Bovier, 2006) or multistable state changes due to external  
508 perturbation or noise (Scott Kelso, 2012; Golos et al., 2015). Recent anesthesia studies of large-scale  
509 brain activity argued that neuronal dynamics may be at equilibrium on short timescales (seconds) but  
510 shows state switching at longer timescales (minutes) (Hudson et al., 2014; Hudson, 2017). Our results  
511 are consistent with these findings while providing additional insight into the spiking behavior of  
512 individual neurons in dynamically transitioning brain states.

513

### 514 **Spikes are synchronously fragmented in anesthesia**

515 The intermittent firing pattern observed in anesthetized brain states (i.e., the increased LV and bimodal  
516 interspike intervals distribution) was synchronous among the neurons and therefore which was also  
517 reflected in the MUA, by an increase in LPBM. This synchronized fragmentation of spike activity  
518 estimated by the increase of individual-to-population correlation was more effective in distinguishing  
519 the four brain states (except S3) than all the other examined properties of spike dynamics suggesting that  
520 the synchronously fragmented spike activity is the most pronounced effect of anesthesia (Fig. 6C). A  
521 higher value of individual-to-population coupling implies that the spike activity of each neuron is  
522 constrained to the population activity. From the perspective of information processing, this must be an

523 undesirable condition. Because the entire population acts like a single neuron, information capacity of  
524 the population is very low (Tononi, 2004; Izhikevich, 2006). Although high individual-to-population  
525 coupling suggests an increase of shared information among neurons, because information content of a  
526 single neuron is extremely limited, one could surmise that in such condition, the animal would be  
527 unconscious. This also explains why surgery is preferred in anesthetic states when EEG displays slow  
528 oscillations. Synchronized fragmentation of spike activity has also been reported with other anesthetics,  
529 such as ketamine/xylazine (Compte et al., 2003), urethane (Steriade et al., 1993; Kasanetz et al., 2002;  
530 Clement et al., 2008), propofol (Lewis et al., 2012), in addition to desflurane (Vizueté et al., 2014)  
531 despite the agents' diverse molecular structure and pharmacological targets. Thus, our study suggests  
532 that synchronously fragmented spike pattern seen with most anesthetics is a common signature of  
533 impaired information processing closely associated with loss of consciousness.

534

### 535 **Unlike sleep, anesthesia may disrupt sensory functions**

536 We found that desflurane reduced the spike rate of most neurons regardless of their wakeful firing rate  
537 unlike sleep that was found to differentially alter high-firing and low-firing neurons (Miyawaki and  
538 Diba, 2016). In natural sleep, the spike rate of high-firing neurons substantially decreased while the  
539 spike rate of low-firing neurons was enhanced (Watson et al., 2016). It has been suggested that high-  
540 firing neurons appear to be comprised of so-called *choristers*, which conform to the mean spike rate of  
541 the neuronal population, while the low-firing neurons called *soloists* respond to stimulation with firing  
542 rate changes distinct from that of the population (Bachatene et al., 2015). Specifically, the preferential  
543 augmentation of spike rate of low-firing, stimulus-selective neurons during rapid eye movement sleep  
544 has been thought to contribute to an increase of the signal-to-noise ratio of sensory processing. The fact

545 that desflurane decreased the spike rate of virtually all neurons, including those with low baseline firing  
546 rate, may be one of the reasons why sensory functions fail in anesthesia.

547

#### 548 **Anesthesia facilitates bursting of excitatory neurons**

549 A recent modeling study of spiking neuronal network demonstrated that burst-spikes of individual  
550 neurons is more influenced by their presynaptic environment than by their cell type (Tomov et al.,  
551 2016). For example, regular spiking neurons could exhibit burst firing by network-mediated effect.  
552 Burst-spikes of individual neurons can also shape global network dynamics. In urethane anesthetized  
553 rats, burst-spikes induced by electrical stimulation of a single cortical neuron could switch global  
554 cortical state from slow oscillation (synchronized activity) to persistent UP state and vice versa (Li et al.,  
555 2009). Nevertheless, the causal relationship between the intrinsic spiking pattern of individual neurons  
556 and network synchronization has yet to be fully elucidated. While some neurons showed bursting, about  
557 three quarter of neurons were essentially inactive (fired at  $< 1$  Hz) in deep anesthesia. Several modeling  
558 studies postulated the suppression of metabolic rate in the brain as a key mechanism of anesthetic-  
559 induced low frequency oscillations and burst-suppression (Cunningham et al., 2006; Ching et al., 2010,  
560 2012). Another study reported the occurrence of burst-spikes is highly associated with suppression of  
561 spike activity, such that hyper-excitable state at the end of suppression period enables an emission of  
562 burst-spikes (Kroeger and Amzica, 2007). However, it remains uncertain how anesthesia almost  
563 completely suppresses majority of neurons while causing burst and synchronized activity in the  
564 remaining active neurons. Synchronous firing may be the only way for a neuronal network to maintain  
565 its activity under synaptic inhibition in anesthesia (Lukatch and MacIver, 1996); synchronous firing  
566 allows neurons to receive enough number of spikes from connected neurons within a short time period,  
567 thereby preventing from a decay of spike activity. In this scenario, neurons with many and strong

568 synaptic connections would generate a large number of action potentials with high synchronization, and  
569 vice versa. According to recent study, neurons with strong population coupling (choristers) receive  
570 many synaptic inputs from their neighbors, and show high firing rate both in wakefulness and anesthesia  
571 (Okun et al., 2015). However, the existence of a paradoxical desynchronized state in deep anesthesia  
572 suggests the possibility of an alternative scenario in which neurons fire asynchronously while the mean  
573 firing rate is profoundly suppressed comparable to an averaged firing rate during burst-suppression  
574 period. Future modeling study of anesthesia which considers spike rate distribution and synaptic  
575 connections as well as the anesthetic-induced brain states may be able illuminate the possible causal  
576 relationship of spike rate distribution, burst activity, and synchronization.

577

### 578 **The paradoxical desynchronized state and consciousness**

579 In the paradoxical desynchronized state (S3) which was mostly found during deep anesthesia (6%  
580 desflurane), the mean spike rate was as low as in S1 (burst-suppression period), however a small portion  
581 of neurons showed distinctly high spike rate (Fig. 4B-C). Interestingly, the firing pattern of neural  
582 population was asynchronous, similar to wakefulness (Fig. 5). Together with the relatively high EMG  
583 activity (Fig. 3F-G), this suggested that S3 could be considered a paradoxically aroused state. It can be  
584 surmised that there was at least a theoretical possibility of transient awareness in this state. A similar  
585 proposal has been put forward for the UP states in slow-wave sleep (Destexhe et al., 2007). Given the  
586 unexpected nature of this paradoxical state, replication of this finding together with a more systematic  
587 behavioral assessment or level of consciousness will offer a more significant clinical implication and  
588 advance the general understanding of the neuronal network dynamics.

589

## 590 **Spiking behavior changes monotonically with brain state**

591 It has been widely reported that most properties of large-scale brain activity (EEG, LFP) exhibit a  
592 biphasic pattern with anesthetic depth; i.e., an initial increase (decrease) of EEG/LFP variable is  
593 followed by decrease (increase) as anesthesia deepens. (Borgeat et al., 1991; Kuizenga et al., 1998,  
594 2001; Lee et al., 2017). In agreement, in our study, the low-frequency dominance of LFP (L/H ratio)  
595 first increased then decreased (ignoring S3) as the anesthetic was stepwise withdrawn. Unexpectedly,  
596 the spiking behavior did not follow this biphasic pattern; the changes were always monotonic for all  
597 spike properties from burst-suppression (S1) to full wakefulness (S5) (again, ignoring S3). The reason  
598 for this discrepancy is not known but it may be due to a limitation of measurements at large-scale level.  
599 For example, spike rate decreases monotonically as the anesthesia deepens but this cannot be measured  
600 directly by EEG or LFP because these measurements mostly reflect synchronous population activity. In  
601 addition, the theory of complex system predicts that for a system consisting of many interacting  
602 elements such as the neuronal network, an incremental change local variables can lead to abrupt,  
603 qualitative change in macroscopic variables; in this case, leading to biphasic macroscopic behavior.

604

## 605 **Conclusions**

606 We identified five distinct brain states during stepwise changes of the anesthetic state. The identified  
607 brain states displayed degeneracy in their relationship with anesthetic concentration suggesting the  
608 presence of metastable or multistable dynamics with specific, transient patterns of neuronal spiking. A  
609 previously unidentified paradoxically desynchronized state was found during deep anesthesia. The  
610 synchronously fragmented spiking in anesthesia appears to be a robust signature of the state of  
611 unconsciousness.

612 **REFERENCES**

- 613 Bachatene L, Bharmauria V, Cattan S, Chanauria N, Rouat J, Molotchnikoff S (2015)  
614 Electrophysiological and firing properties of neurons: Categorizing soloists and choristers in  
615 primary visual cortex. *Neurosci Lett* 604:103–108.
- 616 Borgeat A, Dessibourg C, Popovic V, Meier D, Blanchard M, Schwander D (1991) Propofol and  
617 spontaneous movements: An EEG study. *Anesthesiology*.
- 618 Bovier A (2006) Metastability: A potential theoretic approach. *Int Congr Math* 3:499–518.
- 619 Buzsáki G, Mizuseki K (2014) The log-dynamic brain: How skewed distributions affect network  
620 operations. *Nat Rev Neurosci* 15:264–278.
- 621 Chander D, García PS, MacColl JN, Illing S, Sleight JW (2014) Electroencephalographic variation  
622 during end maintenance and emergence from surgical anesthesia. *PLoS One* 9:e106291.
- 623 Ching S, Cimenser A, Purdon PL, Brown EN, Kopell NJ (2010) Thalamocortical model for a propofol-  
624 induced alpha-rhythm associated with loss of consciousness. *Proc Natl Acad Sci* 107:22665–22670.
- 625 Ching SN, Purdon PL, Vijayan S, Kopell NJ, Brown EN (2012) A neurophysiological-metabolic model  
626 for burst suppression. *Proc Natl Acad Sci U S A* 109:3095–3100.
- 627 Clement EA, Richard A, Thwaites M, Ailon J, Peters S, Dickson CT (2008) Cyclic and sleep-like  
628 spontaneous alternations of brain state under urethane anaesthesia. *PLoS One* 3:e2004.
- 629 Compte A et al. (2003) Cellular and network mechanisms of slow oscillatory activity (<1 Hz) and wave  
630 propagations in a cortical network model. *J Neurophysiol* 89:2707–2725.
- 631 Csicsvari J, Hirase H, Czurko A, Buzsáki G (1998) Reliability and state dependence of pyramidal cell-  
632 interneuron synapses in the hippocampus: An ensemble approach in the behaving rat. *Neuron*

- 633 21:179–189.
- 634 Cunningham MO, Pervouchine DD, Racca C, Kopell NJ, Davies CH, Jones RSG, Traub RD,  
635 Whittington M a (2006) Neuronal metabolism governs cortical network response state. *Proc Natl*  
636 *Acad Sci U S A* 103:5597–5601.
- 637 Destexhe A, Hughes SW, Rudolph M, Crunelli V (2007) Are corticothalamic “up” states fragments of  
638 wakefulness? *Trends Neurosci* 30:334–342.
- 639 Golos M, Jirsa V, Daucé E (2015) Multistability in large scale models of brain activity. *PLoS Comput*  
640 *Biol* 11:e1004644.
- 641 Hudson AE (2017) Metastability of neuronal dynamics during general anesthesia: Time for a change in  
642 our assumptions? *Front Neural Circuits* 11:1–10.
- 643 Hudson AE, Paola D, Pfaff DW, Proekt A (2014) Recovery of consciousness is mediated by a network  
644 of discrete metastable activity states. *Proc Natl Acad Sci* 111:9283–9288.
- 645 Ito S, Hansen ME, Heiland R, Lumsdaine A, Litke AM, Beggs JM (2011) Extending transfer entropy  
646 improves identification of effective connectivity in a spiking cortical network model. *PLoS One*  
647 6:e27431.
- 648 Izhikevich EM (2006) Polychronization: Computation with Spikes. *Neural Comput* 18:245–282.
- 649 Kasanetz F, Riquelme LA, Murer MG (2002) Disruption of the two-state membrane potential of striatal  
650 neurones during cortical desynchronisation in anaesthetised rats. *J Physiol* 543:557–589.
- 651 Kroeger D, Amzica F (2007) Hypersensitivity of the anesthesia-induced comatose brain. *J Neurosci*  
652 27:10597–10607.
- 653 Kuizenga K, Kalkman CJ, Hennis PJ (1998) Quantitative electroencephalographic analysis of the



- 654 biphasic concentration-effect relationship of propofol in surgical patients during extradural  
655 analgesia. *Br J Anaesth* 80:725–732.
- 656 Kuizenga K, Proost JH, Wierda JM, Kalkman CJ (2001) Predictability of processed  
657 electroencephalography effects on the basis of pharmacokinetic-pharmacodynamic modeling  
658 during repeated propofol infusions in patients with extradural analgesia. *Anesthesiology* 95:607–  
659 615.
- 660 Lee H, Noh G, Joo P, Choi B, Silverstein BH, Kim M, Wang J, Jung W, Kim S (2017) Diversity of  
661 functional connectivity patterns is reduced in propofol-induced unconsciousness. 38:4980–4995.
- 662 Lewis LD, Weiner VS, Mukamel EA, Donoghue JA, Eskandar EN, Madsen JR, Anderson WS,  
663 Hochberg LR, Cash SS, Brown EN, Purdon PL (2012) Rapid fragmentation of neuronal networks  
664 at the onset of propofol-induced unconsciousness. *Proc Natl Acad Sci U S A* 109:E3377–E3386.
- 665 Li CYT, Poo MM, Dan Y (2009) Burst spiking of a single cortical neuron modifies global brain state.  
666 *Science* 324:643–646.
- 667 Li D et al. (2019) Dynamic cortical connectivity during general anesthesia in healthy volunteers.  
668 *Anesthesiology* 130:870–884.
- 669 Liang Z, Wang Y, Sun X, Li D, Voss LJ, Sleigh JW, Hagihira S, Li X (2015) EEG entropy measures in  
670 anesthesia. *Front Comput Neurosci* 9:1–17.
- 671 Liu Q, Ma L, Fan SZ, Abbod MF, Shieh JS (2018) Sample entropy analysis for the estimating depth of  
672 anaesthesia through human EEG signal at different levels of unconsciousness during surgeries.  
673 *PeerJ* 6:e4817.
- 674 Lorenz MO (1905) Methods of measuring the concentration of wealth. *Publ Am Stat Assoc*.

- 675 Lubba CH, Sethi SS, Knaute P, Schultz SR, Fulcher BD, Jones NS (2019) catch22: CAnonical Time-  
676 series CHaracteristics: Selected through highly comparative time-series analysis. *Data Min Knowl*  
677 *Discov* 33:1821–1852.
- 678 Lukatch HS, MacIver MB (1996) Synaptic mechanisms of thiopental-induced alterations in  
679 synchronized cortical activity. *Anesthesiology* 84:1425–1434.
- 680 Miyawaki H, Diba K (2016) Regulation of hippocampal firing by network oscillations during sleep.  
681 *Curr Biol* 26:893–902.
- 682 Okun M, Steinmetz NA, Cossell L, Iacaruso MF, Ko H, Barthó P, Moore T, Hofer SB, Mrsic-Flogel  
683 TD, Carandini M, Harris KD (2015) Diverse coupling of neurons to populations in sensory cortex.  
684 *Nature* 521:511–515.
- 685 Richman JS, Moorman JR, Physiol AJ, Circ H (2000) Physiological time-series analysis using  
686 approximate entropy and sample entropy. *Am J Physiol Hear Circ Physiol* 278:H2039–H2049.
- 687 Schreiber T (2000) Measuring information transfer. *Phys Rev Lett* 85:461–464.
- 688 Scott Kelso JA (2012) Multistability and metastability: Understanding dynamic coordination in the  
689 brain. *Philos Trans R Soc B Biol Sci* 367:906–918.
- 690 Sellers KK, Bennett D V., Hutt A, Fröhlich F (2013) Anesthesia differentially modulates spontaneous  
691 network dynamics by cortical area and layer. *J Neurophysiol* 110:2739–2751.
- 692 Shinomoto S, Shima K, Tanji J (2003) Differences in spiking patterns among cortical neurons. *Neural*  
693 *Comput* 15:2823–2842.
- 694 Sirota A, Montgomery S, Fujisawa S, Isomura Y, Zugaro M, Buzsáki G (2008) Entrainment of  
695 neocortical neurons and gamma oscillations by the hippocampal theta rhythm. *Neuron* 60:683–697.

- 696 Steriade M, Nunez A, Amzica F (1993) A novel slow (< 1 Hz) oscillation of neocortical neurons in vivo:  
697 Depolarizing and hyperpolarizing components. *J Neurosci* 13:4352–3265.
- 698 Tomov P, Pena RFO, Roque AC, Zaks MA (2016) Mechanisms of self-sustained oscillatory states in  
699 hierarchical modular networks with mixtures of electrophysiological cell types. *Front Comput*  
700 *Neurosci* 10:1–17.
- 701 Tononi G (2004) An information integration theory of consciousness. *BMC Neurosci* 5:1–22.
- 702 Vizuete JA, Pillay S, Diba K, Ropella KM, Hudetz AG, Eugene F, Vizuete JA, Pillay S, Diba K,  
703 Ropella KM, Hudetz AG (2012) Monosynaptic functional connectivity in cerebral cortex during  
704 wakefulness and under graded levels of anesthesia. *Front Integr Neurosci* 6:1–11.
- 705 Vizuete JA, Pillay S, Ropella KM, Hudetz AG (2014) Graded defragmentation of cortical neuronal  
706 firing during recovery of consciousness in rats. *Neuroscience* 275:340–351.
- 707 Vyazovskiy V V., Olcese U, Hanlon EC, Nir Y, Cirelli C, Tononi G (2011) Local sleep in awake rats.  
708 *Nature* 472:443–447.
- 709 Watson BO, Levenstein D, Greene JP, Gelinás JN, Buzsáki G (2016) Network homeostasis and state  
710 dynamics of neocortical sleep. *Neuron* 90:839–852.
- 711 Yger P, Spampinato GLB, Esposito E, Lefebvre B, Deny S, Gardella C, Stimberg M, Jetter F, Zeck G,  
712 Picaud S, Duebel J, Marre O (2018) A spike sorting toolbox for up to thousands of electrodes  
713 validated with ground truth recordings in vitro and in vivo. *Elife* 7:1–23.
- 714

715 **FIGURE LEGENDS**

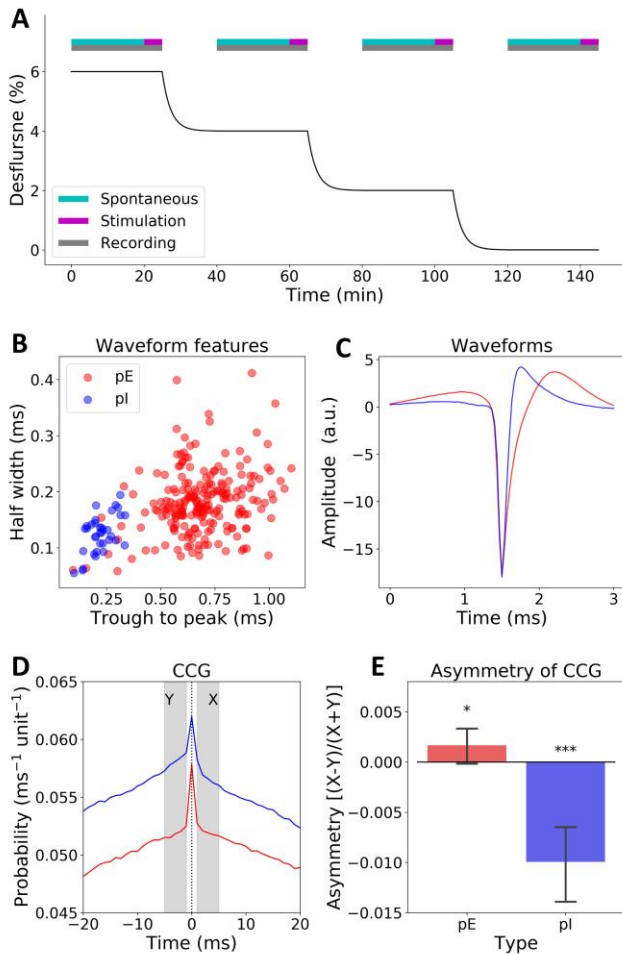

716

717 **Figure 1. Anesthetic procedure and identification of excitatory and inhibitory units** (A) Schematic  
718 representation of the anesthesia protocol. The volatile anesthetic desflurane was administered at steady state  
719 concentrations and decreased in a stepwise manner. This study used spontaneous activity data only. (B) Putative  
720 excitatory (pE) and inhibitory (pI) units were classified based on spike waveform features and the  
721 autocorrelogram (not shown). (C) Average spike waveform of pE (n=215) and pI (n=36) units. (D) Average  
722 cross-correlogram (CCG) between single unit activity and multi-unit activity (MUA). The cross-correlogram was  
723 normalized by dividing the number of units in MUA. (E) Asymmetry of CCG confirms the identification of pE  
724 and pI units. Error bar indicates 95% confidence interval across units (\*p<0.05, \*\*\*p<0.001; one-sided *t* test with  
725 Bonferroni correction).

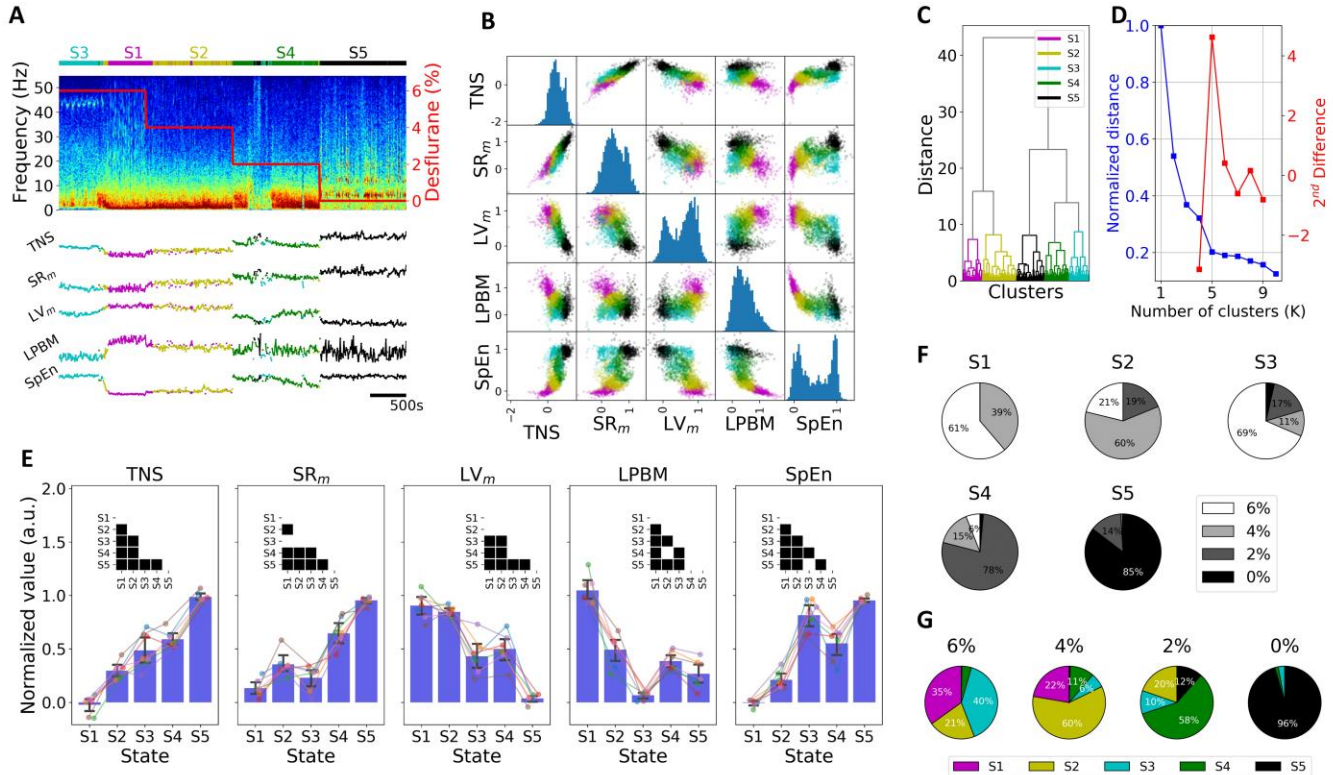

726

727 **Figure 2. Classification of brain states** (A) Local field potential spectrogram and traces of five features from a  
 728 representative animal; TNS: total number of spikes,  $SR_m$ : mean of log-transformed spike rate,  $LV_m$ : mean local  
 729 variation, LPBM: longest period below mean, SpEn: sample entropy. Colors in the horizontal bar above the  
 730 spectrogram indicate different brain states (S1 through S5) as classified by clustering. (B) Scatter and histogram  
 731 plots of the five features used for state clustering from pooled data. (C) Dendrogram generated from hierarchical  
 732 agglomerative clustering. (D) Elbow method suggests the optimal number of clusters as  $K=5$ . (E) Brain state-  
 733 dependent changes of the five features. Error bar indicates 95% confidence interval across animals. The inset in  
 734 each panel represents statistically significant difference between pairs of brain states. (F) Relative frequency of  
 735 four anesthetic concentrations supporting each brain state; pooled data from seven animals. (G) Relative  
 736 frequency of five brain states at each anesthetic concentration; pooled data from seven animals.

737

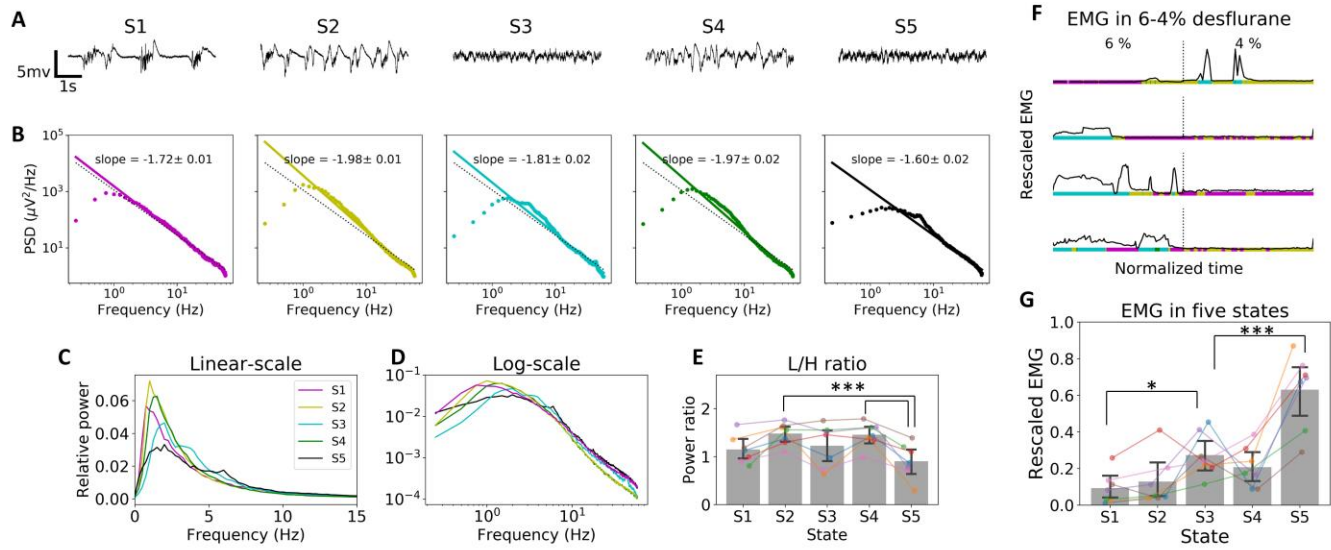

738

739 **Figure 3. Local field potential (LFP) and electromyography (EMG) in five brain states** (A) Example LFP  
 740 traces from one animal. (B) Power spectral density (PSD) vs. frequency plot shows power-law relationship in the  
 741 five brain states. Data were averaged from the seven animals. (C) Relative PSD vs. frequency plot in a linear  
 742 scale. (D) Log-scale representation of the PSD-frequency plot. (E) L/H power ratio across five brain states. The  
 743 L/H ratio is defined as  $\log_{10}\{(\text{PSD at } 0.25\text{-}4 \text{ Hz}) / (\text{PSD at } 30\text{-}59 \text{ Hz})\}$ . Error bar indicates 95% confidence  
 744 interval across animals (\*\* $p < 0.001$  compared to S5). (F) EMG activity (black trace) during 6-4% desflurane in  
 745 four animals. Horizontal bars with different colors indicate different brain states; magenta, yellow, cyan, and  
 746 green for S1, S2, S3, and S4, respectively. (G) EMG in S3 is significantly higher than that of S1 and lower than  
 747 that of S5. Error bar indicates 95% confidence interval across animals (\* $p < 0.05$ , \*\* $p < 0.001$  compared to S3).

748

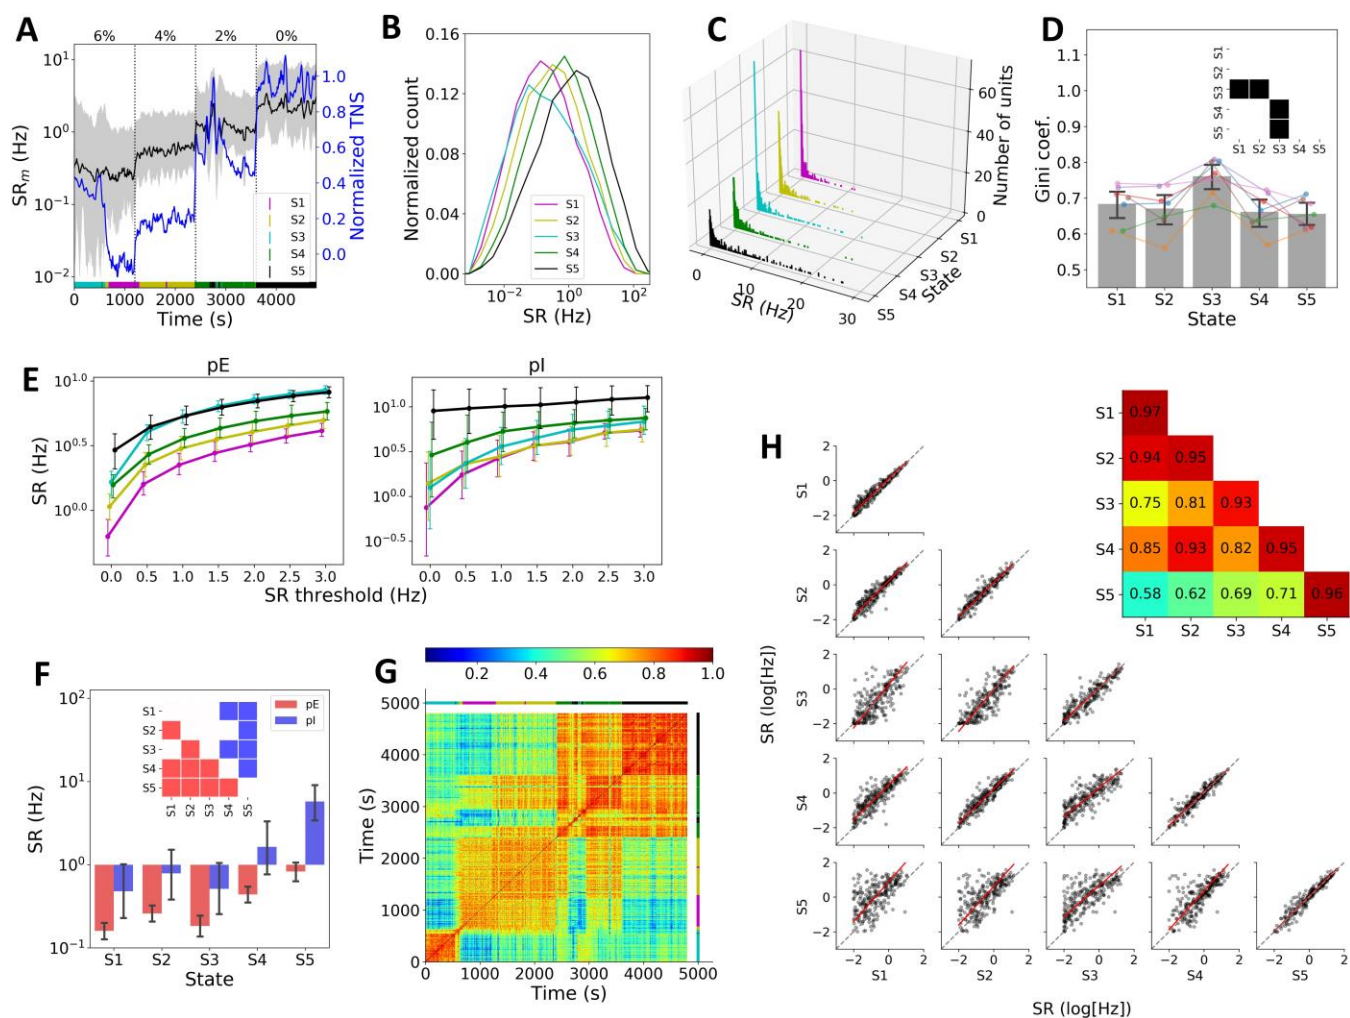

749

750 **Figure 4. Spike rate properties of five brain states.** (A) Example trace of mean spike rate ( $SR_m$ , black) and  
 751 total number of spikes (TNS, blue) from one animal.  $SR_m$  is the average of log-transformed spike rates. Black  
 752 shaded area represents 25th and 75th percentiles of log-transformed spike rate distribution. The horizontal bars  
 753 with different colors indicate different brain states. (B) Log-transformed spike rate distribution in five brain states  
 754 from all individual units. (C) Frequency distribution of untransformed spike rate (SR) in five states. Color code is  
 755 the same as in panel A and B. (D) Gini coefficient of untransformed spike rate distribution. Error bar indicates  
 756 95% confidence interval across units. The inset represents pairwise statistical significance. (E) Average log-  
 757 transformed spike rate as a function of SR threshold for pE (left) and pI (right) units. (F) Comparison of  $SR_m$   
 758 across five states. The inset shows statistically significant difference for pairs of brain state. (G) Pairwise spike  
 759 rate correlation among all epochs from the same animal in panel A. Two color bars above and right of the matrix

760 indicate the five brain states (same color code as before). (H) Orthogonal linear regression of log-transformed  
761 spike rates between brain states. The inset in the upper right corner represents Pearson correlation values for  
762 within- and between-brain states.

763



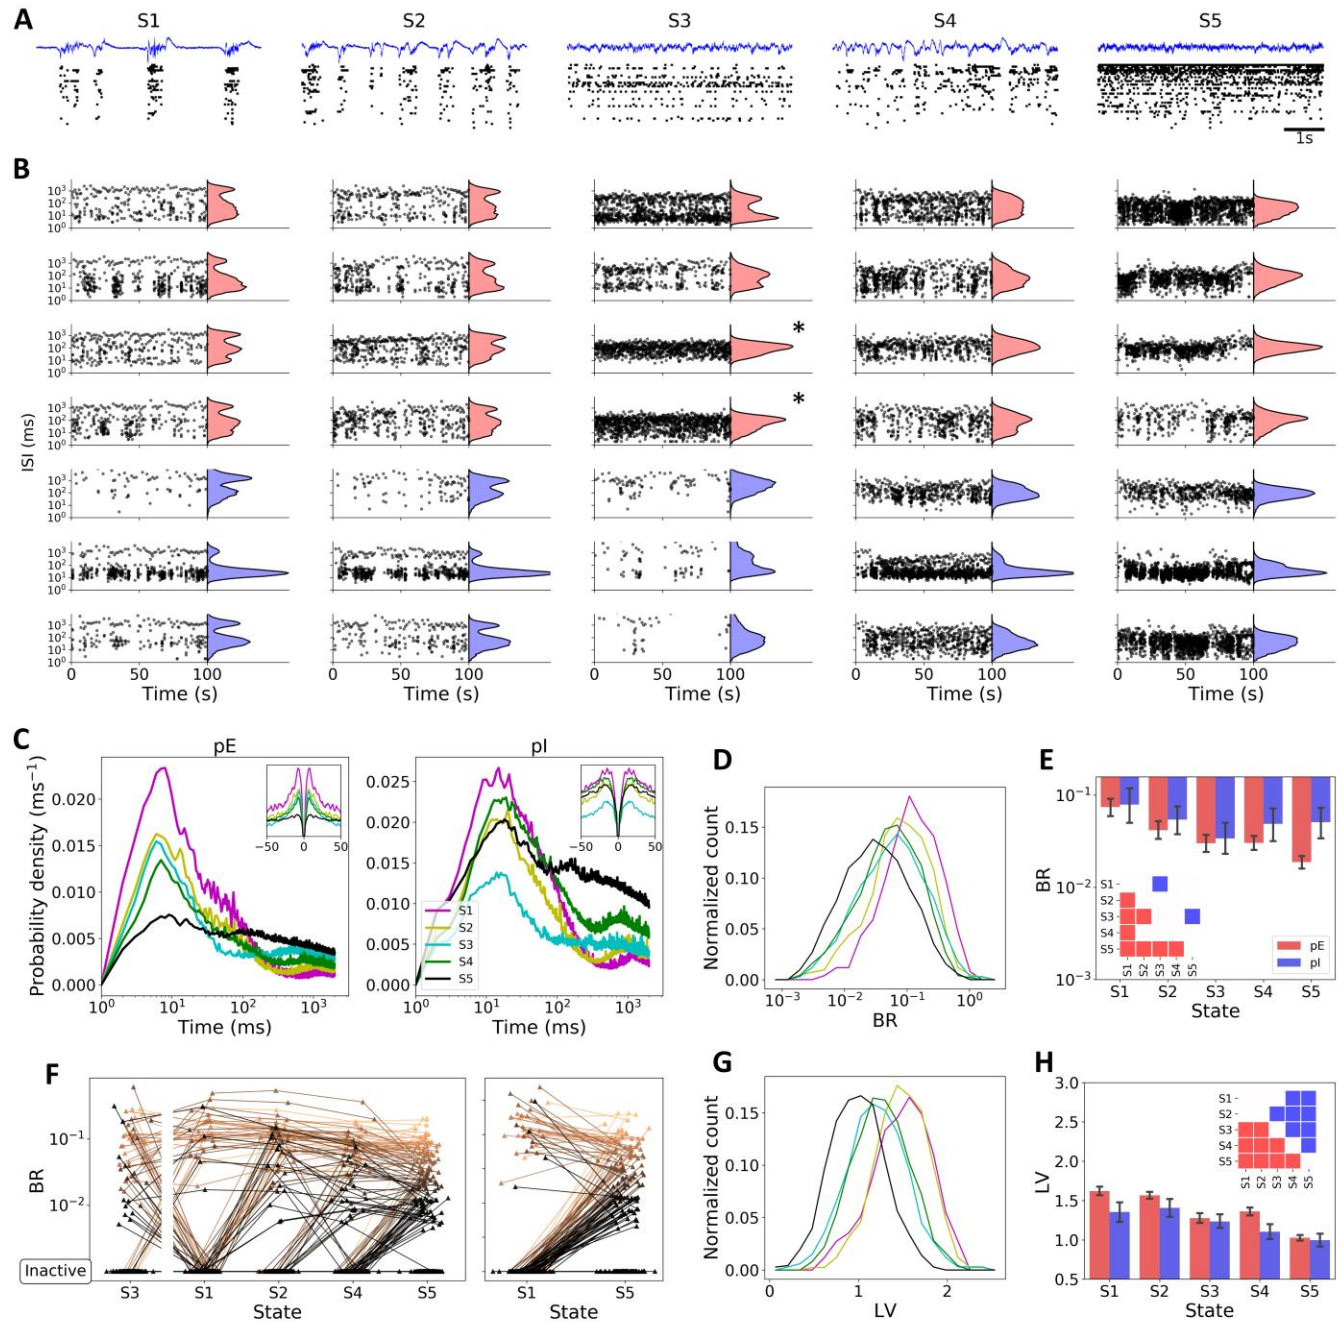

764

765 **Figure 5. Temporal dynamics of individual units** (A) Example local field potential trace and corresponding  
 766 raster plot of single units in one animal in brain states S1 through S5. (B) Raster plot and frequency distribution  
 767 of inter-spike interval (ISI) of seven units from the same animal in panel A; red histograms: pE units, blue  
 768 histograms: pI units. (C) Average normalized autocorrelogram on log-scale calculated from all active units (SR<sub>≥</sub>1  
 769 Hz). Inset: the same autocorrelogram on linear scale for short time lags (-50 to 50-ms). (D) Distribution of burst

770 ratio (BR) of active units ( $SR > 1$  Hz). (E) Comparison of BR across five states. Error bar indicates 95%  
771 confidence interval across units. The inset shows statistically significant pairs of brain state. (F) An illustration  
772 of the change of BR and in(activeness) with brain state in individual pE units shows that pE units become either  
773 bursty or inactive under anesthesia; each line connects data from the same unit. A dark (light) colored line  
774 indicates low (high) BR value in S5. Inactive units ( $SR < 1$  Hz) are shown at the bottom of each panel. For better  
775 visualization of the gradual change from S1 through S2 and S4 to S5, data in S3 were separated to the left. The  
776 right panel emphasizes two extreme cases (S1 and S5). (G) Distribution of local variation (LV) of active units  
777 ( $SR < 1$  Hz) only. (H) Comparison of LV across five states. Error bar indicates 95% confidence interval across  
778 units. The inset represents statistically significant difference for pairs of brain state.

779

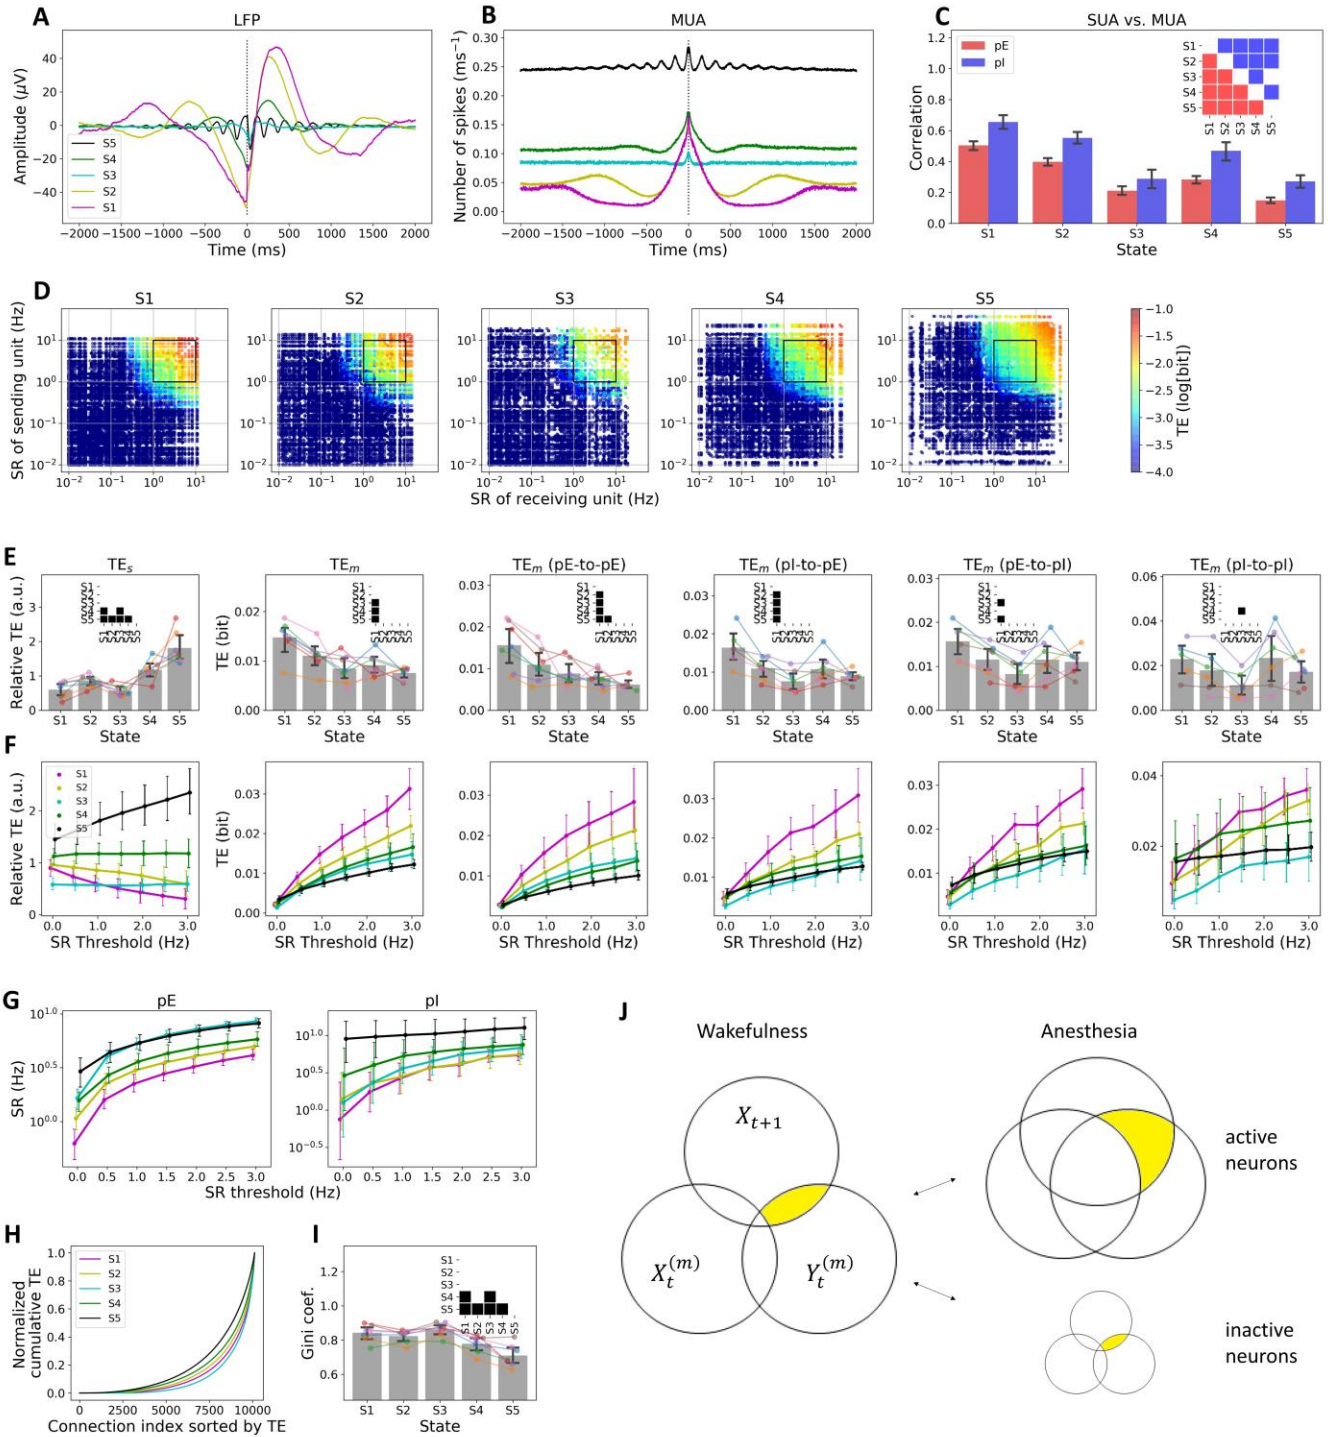

780

781 **Figure 6. Functional connectivity in five brain states** (A) Spike-triggered average local field potential (LFP) in  
 782 brain states S1 through S5. (B) Same for spike-triggered average multi-unit activity (MUA). (C) Pearson  
 783 correlation between single-unit activity (SUA) and MUA. Error bar indicates 95% confidence interval across

784 units. The inset represents statistically significant difference for pairs of brain state. (D) All pairwise transfer  
785 entropy (TE) of individual units from all animals on the axis of spike rate of individual units. The color of each  
786 dot in each panel represents TE value between two units (red for high TE, blue for low TE). The x-axis (y-axis)  
787 corresponds to spike rate of information-receiving (-sending) unit. (E) Comparison of TE of active units ( $SR \geq 1$   
788 Hz) across five brain states. Error bar indicates 95% confidence interval across animals. The inset represents  
789 statistically significant difference between brain states. (F) TE as a function of spike rate threshold; i.e., TE  
790 values of active units are averaged while criteria for active and inactive units varies. States correspond to those as  
791 in the panel above. (G) Average log-transformed spike rate of pE and pI units as a function of spike rate  
792 threshold. (H) Lorenz curve of pairwise TE (including inactive units) from pooled data. (I) Gini coefficient of  
793 the TE distribution. Error bar indicates 95% confidence interval across animals. The inset represents statistically  
794 significant pairs of brain state. (J) Information Venn diagram to illustrate the relationship between two neurons,  $X$   
795 and  $Y$  in wakefulness and anesthesia. The yellow area indicates the amount of information transfer from  $Y$  to  $X$   
796 ( $TE_{y \rightarrow x}$ ). High spiking activity in wakefulness suggests high TE (left). In anesthesia, neurons are either inactive  
797 or intermittent/burst firing with enhanced synchronization. TE between inactive neurons is extremely small,  
798 whereas TE between active neurons is larger than the TE in wakefulness. This results in a large variation of TE  
799 values as seen in (H, I).

800 **TITLE LEGENDS**

|                 | S1-S2        | S1-S3        | S1-S4        | S1-S5        | S2-S3        | S2-S4       | S2-S5        | S3-S4        | S3-S5        | S4-S5        |
|-----------------|--------------|--------------|--------------|--------------|--------------|-------------|--------------|--------------|--------------|--------------|
| TNS             | $< 10^{-9}$  | $< 10^{-25}$ | $< 10^{-36}$ | $< 10^{-99}$ | $< 10^{-3}$  | $< 10^{-8}$ | $< 10^{-46}$ | 0.295        | $< 10^{-24}$ | $< 10^{-15}$ |
| SR <sub>m</sub> | $< 10^{-3}$  | 0.578        | $< 10^{-22}$ | $< 10^{-56}$ | 0.135        | $< 10^{-6}$ | $< 10^{-30}$ | $< 10^{-14}$ | $< 10^{-44}$ | $< 10^{-7}$  |
| LV <sub>m</sub> | 2.621        | $< 10^{-18}$ | $< 10^{-13}$ | $< 10^{-61}$ | $< 10^{-13}$ | $< 10^{-9}$ | $< 10^{-53}$ | 1.900        | $< 10^{-12}$ | $< 10^{-17}$ |
| LPBM            | $< 10^{-19}$ | $< 10^{-59}$ | $< 10^{-26}$ | $< 10^{-37}$ | $< 10^{-11}$ | 0.750       | 0.002        | $< 10^{-6}$  | 0.007        | 0.451        |
| SpEn            | $< 10^{-3}$  | $< 10^{-55}$ | $< 10^{-25}$ | $< 10^{-76}$ | $< 10^{-30}$ | $< 10^{-9}$ | $< 10^{-45}$ | $< 10^{-5}$  | 0.068        | $< 10^{-13}$ |

801 **Table 1.** P-values of post hoc test for the five features. These features were used as an input to the clustering  
 802 algorithm for the brain state classification. P-values were Bonferroni corrected.

803

804

805

806

807

808

|                            | S1-S2        | S1-S3         | S1-S4        | S1-S5         | S2-S3        | S2-S4        | S2-S5         | S3-S4        | S3-S5        | S4-S5        |
|----------------------------|--------------|---------------|--------------|---------------|--------------|--------------|---------------|--------------|--------------|--------------|
| SR (pE)                    | $< 10^{-6}$  | 1.164         | $< 10^{-30}$ | $< 10^{-81}$  | $< 10^{-3}$  | $< 10^{-8}$  | $< 10^{-40}$  | $< 10^{-23}$ | $< 10^{-69}$ | $< 10^{-12}$ |
| SR (pI)                    | 0.875        | 8.112         | $< 10^{-3}$  | $< 10^{-16}$  | 1.416        | 0.108        | $< 10^{-10}$  | $< 10^{-3}$  | $< 10^{-15}$ | $< 10^{-3}$  |
| Gini coef.                 | 5.108        | $< 10^{-3}$   | 2.526        | 1.433         | $< 10^{-4}$  | 6.267        | 4.202         | $< 10^{-5}$  | $< 10^{-6}$  | 7.493        |
| BR (pE)                    | 0.001        | $< 10^{-13}$  | $< 10^{-8}$  | $< 10^{-26}$  | $< 10^{-3}$  | 0.089        | $< 10^{-12}$  | 0.695        | 0.013        | $< 10^{-6}$  |
| BR (pI)                    | 1.170        | 0.003         | 2.359        | 4.400         | 0.260        | 6.570        | 3.690         | 0.055        | 0.012        | 6.339        |
| LV (pE)                    | 0.350        | $< 10^{-36}$  | $< 10^{-22}$ | $< 10^{-114}$ | $< 10^{-30}$ | $< 10^{-16}$ | $< 10^{-111}$ | 0.003        | $< 10^{-22}$ | $< 10^{-47}$ |
| LV (pI)                    | 5.354        | 0.157         | $< 10^{-6}$  | $< 10^{-13}$  | 0.013        | $< 10^{-9}$  | $< 10^{-18}$  | 0.014        | $< 10^{-7}$  | 0.046        |
| Corr (pE)                  | $< 10^{-20}$ | $< 10^{-159}$ | $< 10^{-96}$ | $< 10^{-243}$ | $< 10^{-77}$ | $< 10^{-32}$ | $< 10^{-144}$ | $< 10^{-12}$ | $< 10^{-7}$  | $< 10^{-45}$ |
| Corr (pI)                  | 0.006        | $< 10^{-35}$  | $< 10^{-8}$  | $< 10^{-40}$  | $< 10^{-21}$ | 0.018        | $< 10^{-25}$  | $< 10^{-11}$ | 7.046        | $< 10^{-14}$ |
| TE <sub>s</sub>            | 1.132        | 8.272         | 0.003        | $< 10^{-12}$  | 0.715        | 0.434        | $< 10^{-7}$   | 0.001        | $< 10^{-13}$ | 0.001        |
| TE <sub>m</sub>            | 0.059        | $< 10^{-4}$   | 0.001        | $< 10^{-6}$   | 0.457        | 1.505        | 0.075         | 5.753        | 4.999        | 2.169        |
| TE <sub>m</sub> (pE-to-pE) | 0.017        | $< 10^{-4}$   | $< 10^{-5}$  | $< 10^{-8}$   | 1.633        | 0.334        | 0.016         | 4.639        | 0.775        | 3.018        |
| TE <sub>m</sub> (pI-to-pE) | 0.002        | $< 10^{-8}$   | 0.001        | $< 10^{-5}$   | 0.094        | 8.457        | 1.205         | 0.163        | 2.966        | 1.744        |
| TE <sub>m</sub> (pE-to-pI) | 0.102        | $< 10^{-5}$   | 0.094        | 0.031         | 0.115        | 9.764        | 6.852         | 0.125        | 0.338        | 7.07         |
| TE <sub>m</sub> (pI-to-pI) | 3.434        | 0.071         | 5.831        | 3.411         | 0.645        | 1.126        | 9.968         | 0.006        | 0.604        | 1.086        |
| Gini coef. (TE)            | 2.576        | 2.462         | 0.002        | $< 10^{-13}$  | 0.219        | 0.093        | $< 10^{-9}$   | $< 10^{-5}$  | $< 10^{-17}$ | 0.001        |

809 **Table 2.** P-values of post hoc test for all SUA features. P-values were Bonferroni corrected.

810
